# Supplementary material for: Sustainable production of acrolein: catalytic performance of hydrated tantalum oxides for gas-phase dehydration of glycerol
Source: Royal Society of Chemistry journal article supplement (doi:10.1039/c2gc16483c), 2013-01-01
Supplement: c2gc16483c.pdf [file c2gc16483c.pdf]

## Supplementary Information

### **Sustainable production of acrolein: catalytic performance of hydrated tantalum oxides for gas-phase dehydration of glycerol†**

**Li-Zhi Tao, Bo Yan, Yu Liang and Bo-Qing Xu\***

*Innovative Catalysis Program, Key Lab of Organic Optoelectronics & Molecular Engineering,  
Department of Chemistry, Tsinghua University, Beijing, 100084, China.*

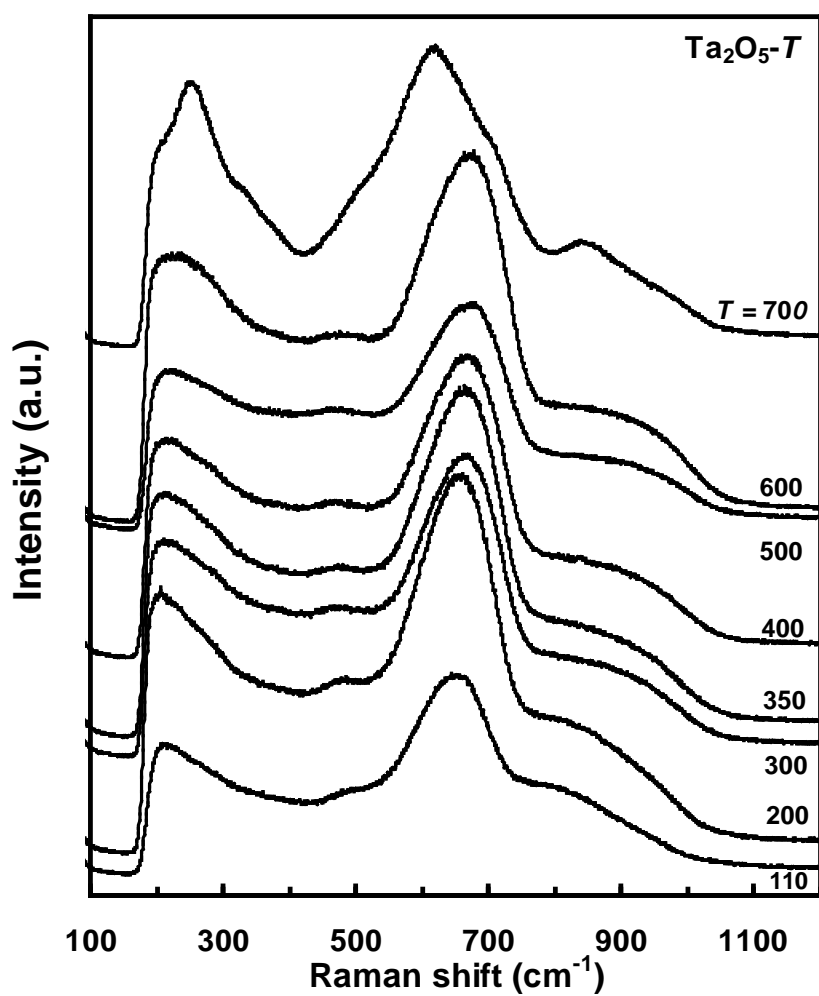

**Figure S1** UV-Raman spectra of  $\text{Ta}_2\text{O}_5$ - $T$  samples of  $T = 110, 200, 300, 350, 400, 500, 600$  and  $700$  °C.

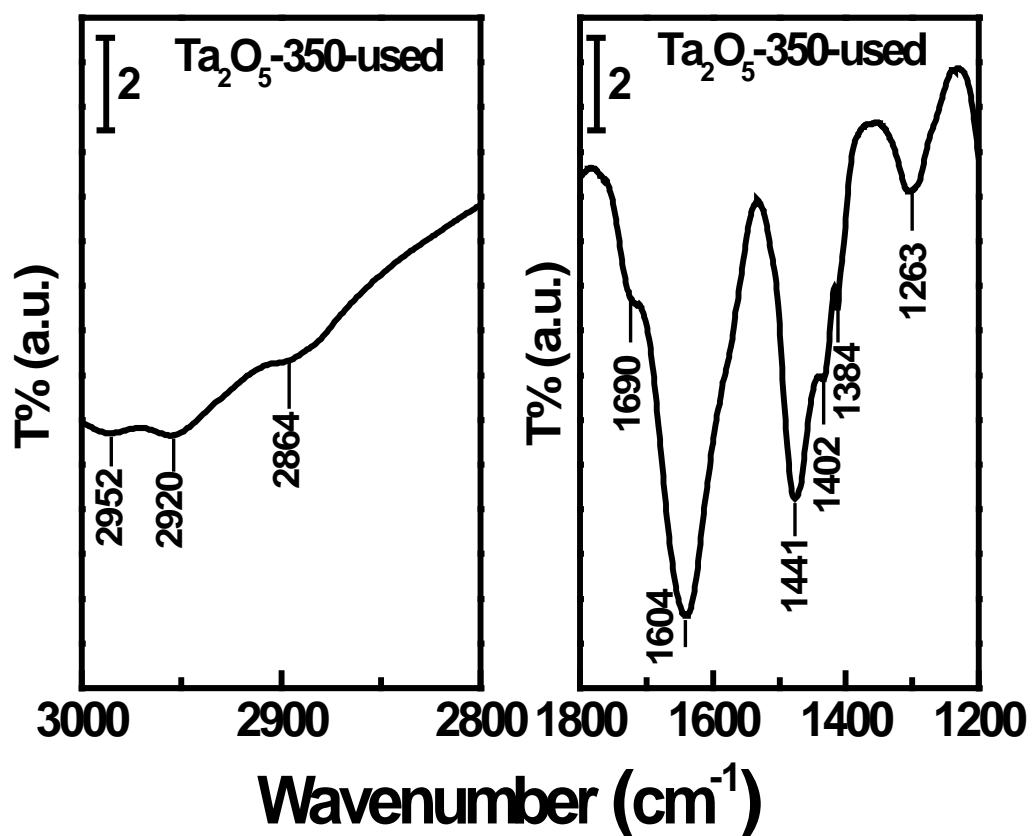

**Figure S2** IR spectra of the used  $\text{Ta}_2\text{O}_5$ -350 catalyst, obtained by unloading the catalyst after it had served the reaction for 10 h at 315 °C and  $\text{GHSV}_{\text{GL}} = 400 \text{ h}^{-1}$ .
